# Supplementary material for: Acute polymicrobial airway infections: analysis in cystic fibrosis mice
Source: PubMed Central journal article supplement (PMC9993112; doi:10.1099/mic.0.001290), 2023-01-25
Supplement: mic-169-1290-s001.pdf [file mic-169-1290-s001.pdf]

**Table S1: Total mortality\* rates of NTHi/*Pa* infected BALB/c mice**

|    | Infection Group                                            | Total (Deaths) | Percent Mortality |
|----|------------------------------------------------------------|----------------|-------------------|
| WT | Control                                                    | 4 (0)          | 0.0%              |
|    | NTHi only (~10 <sup>8</sup> )                              | 8 (2)          | 25.0%             |
|    | NTHi/ <i>Pa</i> Dual (~10 <sup>8</sup> /~10 <sup>7</sup> ) | 9 (0)          | 0.0%              |
|    | <i>Pa</i> only (~10 <sup>7</sup> )                         | 9 (1)          | 11.1%             |
| CF | Control                                                    | 4 (0)          | 0.0%              |
|    | NTHi only (~10 <sup>8</sup> )                              | 7 (1)          | 14.3%             |
|    | NTHi/ <i>Pa</i> Dual (~10 <sup>8</sup> /~10 <sup>7</sup> ) | 8 (2)          | 25.0%             |
|    | <i>Pa</i> only (~10 <sup>7</sup> )                         | 9 (4)          | 44.4%             |

**Table S2: Total mortality\* rates of *Smlt*/*Pa* infected BALB/c mice**

|    | Infection Group                                                    | Total (Deaths) | Percent Mortality |
|----|--------------------------------------------------------------------|----------------|-------------------|
| WT | Control                                                            | 3 (0)          | 0.0%              |
|    | <i>Smlt</i> only (~10 <sup>7</sup> )                               | 4 (0)          | 0.0%              |
|    | <i>Smlt</i> / <i>Pa</i> Dual (~10 <sup>7</sup> /~10 <sup>7</sup> ) | 4 (0)          | 0.0%              |
|    | <i>Pa</i> only (~10 <sup>7</sup> )                                 | 4 (0)          | 0.0%              |
| CF | Control                                                            | 4 (0)          | 0.0%              |
|    | <i>Smlt</i> only (~10 <sup>7</sup> )                               | 4 (0)          | 0.0%              |
|    | <i>Smlt</i> / <i>Pa</i> Dual (~10 <sup>7</sup> /~10 <sup>7</sup> ) | 4 (0)          | 0.0%              |
|    | <i>Pa</i> only (~10 <sup>7</sup> )                                 | 4 (0)          | 0.0%              |

**Table S3: Total mortality\* rates of *Smlt*/*Pa* infected C57BL/6 mice**

|    | Infection Group                                                    | Total (Deaths) | Percent Mortality |
|----|--------------------------------------------------------------------|----------------|-------------------|
| WT | Control                                                            | 5 (0)          | 0.0%              |
|    | <i>Smlt</i> only (~10 <sup>7</sup> )                               | 2 (0)          | 0.0%              |
|    | <i>Smlt</i> / <i>Pa</i> Dual (~10 <sup>7</sup> /~10 <sup>7</sup> ) | 3 (0)          | 0.0%              |
|    | <i>Pa</i> only (~10 <sup>7</sup> )                                 | 3 (0)          | 0.0%              |
| CF | Control                                                            | 9 (0)          | 0.0%              |
|    | <i>Smlt</i> only (~10 <sup>7</sup> )                               | 9 (0)          | 0.0%              |
|    | <i>Smlt</i> / <i>Pa</i> Dual (~10 <sup>7</sup> /~10 <sup>7</sup> ) | 9 (1)          | 11.1%             |
|    | <i>Pa</i> only (~10 <sup>7</sup> )                                 | 9 (1)          | 11.1%             |

\*Mortality is defined as death prior to the end of the study

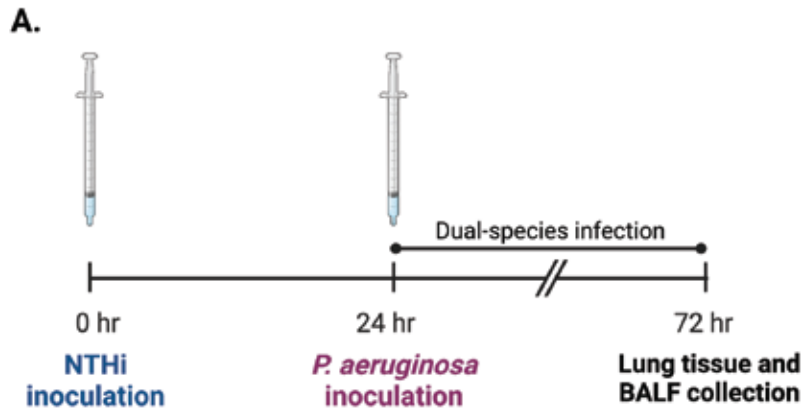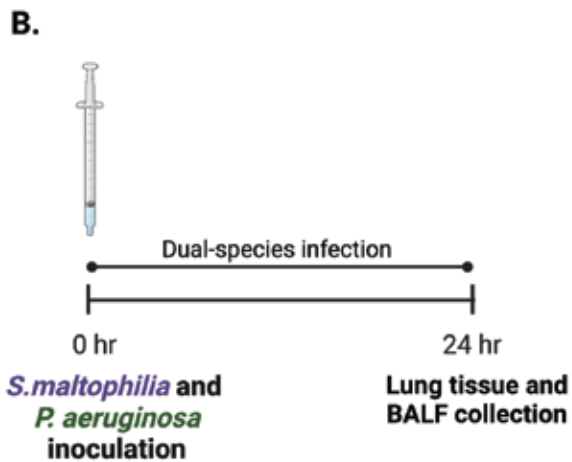

**Figure S1: Timelines of polymicrobial infection.**

Mice were sequentially infected with A) nontypeable *Haemophilus influenzae* (NTHi) 24 hours prior to inoculation with *P. aeruginosa*. At 72 hours post- initial infection (48 hours post- dual infection), the lung tissue and BALF were collected. Mice were concurrently infected with B) *S. maltophilia* and *P. aeruginosa* and the lung tissue and BALF were collected at 24 hours post-infection.
